# Supplementary material for: Bibliografía de las bibliotecas rurales españolas: aporte y llamada para su elaboración
Source: MDPI journal article supplement (doi:10.3390/ijms24087612), 1970-01-01
Supplement: s1 [file s1]

**Supplementary Table S1.** Primers used in this study.

| Primers name             | DNA Sequences (5' to 3') | Application              |
|--------------------------|--------------------------|--------------------------|
| 16s rRNA-F               | GCACGTAATGGTGGGAATC      | qRT-PCR                  |
| 16S rRNA-R               | CTCCAATCCGGACTACGACA     | qRT-PCR                  |
| YZ- <i>pdeR</i> -F       | TTGCCAATAACATCCTGCTCTT   | qRT-PCR                  |
| YZ- <i>pdeR</i> -R       | GCCTATGCCGATACTGAATC     | qRT-PCR                  |
| YZ- <i>yihX</i> -F       | CCGAGTGGTGGTGCTATCTA     | qRT-PCR                  |
| YZ- <i>yihX</i> -R       | GATTCTGGCTTCAGGTTTGC     | qRT-PCR                  |
| YZ- <i>rpsN</i> -F       | ACCCGAACTTCCGCAAGA       | qRT-PCR                  |
| YZ- <i>rpsN</i> -R       | GTGTGAACATCATCCGACGAA    | qRT-PCR                  |
| YZ- <i>rpoA</i> -F       | CGGCAACTATCTTGGCTGAAC    | qRT-PCR                  |
| YZ- <i>rpoA</i> -R       | CAGTTAGCAGAGCGGACAGT     | qRT-PCR                  |
| YZ- <i>trmD</i> -F       | GGCAATCCAGCAATCCATCA     | qRT-PCR                  |
| YZ- <i>trmD</i> -R       | GGTCGGTACGAAGGAGTTGA     | qRT-PCR                  |
| YZ- <i>dhaK</i> -F       | AAGTCGCACTGATGTCTGGT     | qRT-PCR                  |
| YZ- <i>dhaK</i> -R       | GGCTTGACCGCATTCATACA     | qRT-PCR                  |
| YZ- <i>gntT</i> -F       | CCTCTCCTATGCCGAGTTCT     | qRT-PCR                  |
| YZ- <i>gntT</i> -R       | TGTGTCCATCACCGATTCCA     | qRT-PCR                  |
| YZ- <i>YE_RS15980</i> -F | GCTTCCAACAAGTGCTATCAGA   | qRT-PCR                  |
| YZ- <i>YE_RS15980</i> -R | CAAACATTCTTACCGCCACAAC   | qRT-PCR                  |
| YZ- <i>dusB</i> -F       | GTCTGCCGAACACCGTAACT     | qRT-PCR                  |
| YZ- <i>dusB</i> -R       | CGTATTCGCCCTCGCCATTA     | qRT-PCR                  |
| YZ- <i>corA</i> -F       | GGTAACTCAACGGTGGCATT     | qRT-PCR                  |
| YZ- <i>corA</i> -R       | GTCCAGCAGCAACTCATAGG     | qRT-PCR                  |
| YZ- <i>epmA</i> -F       | CGCAGCAATAATGGCAGAGA     | qRT-PCR                  |
| YZ- <i>epmA</i> -R       | AATGGATGTCCGTCACTGTC     | qRT-PCR                  |
| YZ- <i>trmL</i> -F       | CGGCTTACCCTCCAATGTTTC    | qRT-PCR                  |
| YZ- <i>trmL</i> -R       | CAGGCTTCGTACACCACAAC     | qRT-PCR                  |
| YZ- <i>fliE</i> -F       | ACCAGCAAACAGCCCGTA       | qRT-PCR                  |
| YZ- <i>fliE</i> -R       | CGTCTTGATAAGCCGCTACTAA   | qRT-PCR                  |
| YZ- <i>flgC</i> -F       | GTTGATGTGACCGGCGAGAT     | qRT-PCR                  |
| YZ- <i>flgC</i> -R       | AGTGTCAGCGTCTTGAGCAT     | qRT-PCR                  |
| YZ- <i>alaC</i> -F       | GCCGTGGTGAAGACATCATT     | qRT-PCR                  |
| YZ- <i>alaC</i> -R       | CGAGGTTGAATAGCCGTGAG     | qRT-PCR                  |
| YZ- <i>fyuA</i> -F       | TGGCAGCAGCAGCATTATTC     | qRT-PCR                  |
| YZ- <i>fyuA</i> -R       | CATTGTCGGCATGTCGTAGG     | qRT-PCR                  |
| YZ- <i>hypE</i> -F       | CGCCACTACGCCATATTACC     | qRT-PCR                  |
| YZ- <i>hypE</i> -R       | TCCGCTTCGTTGATTTCAT      | qRT-PCR                  |
| YZ- <i>lsrD</i> -F       | TGCCTGTTGTATGCCTTGAC     | qRT-PCR                  |
| YZ- <i>lsrD</i> -R       | GAGCCGTACCGAGAATGGA      | qRT-PCR                  |
| YZ- <i>hisJ</i> -F       | ACAAGGCTCGACTCAGGAAG     | qRT-PCR                  |
| YZ- <i>hisJ</i> -R       | CTCACTGCCAGCGACTTCAT     | qRT-PCR                  |
| <i>dkkA</i> -F           | TAAGCCGCCGATCTGCTGAAT    | To identify <i>ΔdkkA</i> |

|                |                      |                                                                              |
|----------------|----------------------|------------------------------------------------------------------------------|
| <i>dkkA</i> -R | GAAGTCAAGTCGGTTACCTT | To identify $\Delta dkkA$                                                    |
| <i>relA</i> -F | AACAGCAAATCCCCCAATTC | To identify $\Delta relA\Delta spoT$ and $\Delta dkkA\Delta relA\Delta spoT$ |
| <i>relA</i> -R | GGTGCTCAGGCTATAGCAT  | To identify $\Delta relA\Delta spoT$ and $\Delta dkkA\Delta relA\Delta spoT$ |

**Supplementary Table S2.** Statistical analysis of RNA-Seq data in the WT and mutant strains.

| Sample Name                            | Raw Reads | Raw Bases (bp) | Clean Reads | Clean Bases<br>(bp) | Genome Mapped<br>Reads | Genome Mapped<br>Ratio (%) | Unique Mapped<br>Reads | Unique Mapped<br>Reads Ratio (%) |
|----------------------------------------|-----------|----------------|-------------|---------------------|------------------------|----------------------------|------------------------|----------------------------------|
| WT-1                                   | 23676006  | 3575076906     | 23309948    | 3050093381          | 22844598               | 98.00                      | 21828056               | 93.64                            |
| WT-2                                   | 24703604  | 3730244204     | 24303912    | 3160428673          | 23818997               | 98.00                      | 22818158               | 93.89                            |
| WT-3                                   | 23510642  | 3550106942     | 23131770    | 3056330141          | 22691768               | 98.10                      | 21665010               | 93.66                            |
| $\Delta dkkA$ -1                       | 25354062  | 3828463362     | 24970570    | 3325072720          | 24401701               | 97.72                      | 23580072               | 94.43                            |
| $\Delta dkkA$ -2                       | 28460700  | 4297565700     | 28065896    | 3752245167          | 27506717               | 98.01                      | 26545712               | 94.58                            |
| $\Delta dkkA$ -3                       | 24358918  | 3678196618     | 24038218    | 3222763611          | 23548300               | 97.96                      | 22576128               | 93.92                            |
| $\Delta relA\Delta spoT$ -1            | 28023310  | 4231519810     | 27317700    | 3393662150          | 26738618               | 97.88                      | 25971514               | 95.07                            |
| $\Delta relA\Delta spoT$ -2            | 24525074  | 3703286174     | 24244748    | 3158094318          | 23764932               | 98.02                      | 22970646               | 94.74                            |
| $\Delta relA\Delta spoT$ -3            | 23932950  | 3613875450     | 23658478    | 3110151493          | 23193469               | 98.03                      | 22583891               | 95.46                            |
| $\Delta dkkA\Delta relA\Delta spoT$ -1 | 23258634  | 3512053734     | 22960764    | 3002781309          | 22519203               | 98.08                      | 22025031               | 95.92                            |
| $\Delta dkkA\Delta relA\Delta spoT$ -2 | 26148594  | 3948437694     | 25842156    | 3328877730          | 25365103               | 98.15                      | 24723192               | 95.67                            |
| $\Delta dkkA\Delta relA\Delta spoT$ -3 | 27424488  | 4141097688     | 27166778    | 3537542759          | 26584190               | 97.86                      | 25769114               | 94.86                            |

**Supplementary Table S3.** Statistical analysis of ribosome proteins biosynthesis in mutant strains compared to WT.

| Gene ID    | Gene Name   | Description                  | FC<br><i>AdkkA</i> /WT | P value<br><i>AdkkA</i> /WT | FC<br><i>AreLAAspoT</i> /WT | P value<br><i>AreLAAspoT</i> /WT | FC<br><i>AdkkAArelAAspoT</i> /WT | P value<br><i>AdkkAArelAAspoT</i> /WT |
|------------|-------------|------------------------------|------------------------|-----------------------------|-----------------------------|----------------------------------|----------------------------------|---------------------------------------|
| YE_RS03125 | <i>rpsT</i> | 30S ribosomal protein S20    | 2.016                  | 2.82E-05                    | 5.674                       | 4.32E-20                         | 2.578                            | 2.33E-08                              |
| YE_RS20925 | <i>rpmH</i> | 50S ribosomal protein L34    | 2.032                  | 0.002101                    | 6.358                       | 3.43E-15                         | 2.41                             | 0.000259                              |
| YE_RS18770 | <i>rplM</i> | 50S ribosomal protein L13    | 2.937                  | 3.23E-07                    | 3.573                       | 1.56E-12                         | 3.147                            | 3.23E-10                              |
| YE_RS04275 | <i>rplS</i> | 50S ribosomal protein L19    | NS                     | NS                          | 2.541                       | 6.17E-13                         | NS                               | NS                                    |
| YE_RS19585 | <i>rpmD</i> | 50S ribosomal protein L30    | 2.207                  | 5.63E-08                    | 2.587                       | 5.10E-13                         | NS                               | NS                                    |
| YE_RS18470 | <i>rpsU</i> | 30S ribosomal protein S21    | 2.204                  | 0.008421                    | 2.568                       | 0.001224                         | 2.063                            | 0.011729                              |
| YE_RS19645 | <i>rpsC</i> | 30S ribosomal protein S3     | 2.027                  | 1.79E-05                    | 2.995                       | 1.70E-10                         | NS                               | NS                                    |
| YE_RS19635 | <i>rpmC</i> | 50S ribosomal protein L29    | NS                     | NS                          | 2.418                       | 2.14E-08                         | NS                               | NS                                    |
| YE_RS19630 | <i>rpsQ</i> | 30S ribosomal protein S17    | NS                     | NS                          | 2.044                       | 0.000564                         | NS                               | NS                                    |
| YE_RS00325 | <i>rpmB</i> | 50S ribosomal protein L28    | 2.311                  | 0.000153                    | 3.544                       | 4.13E-08                         | 2.03                             | 0.002088                              |
| YE_RS00550 | <i>rpmE</i> | 50S ribosomal protein L31    | NS                     | NS                          | 3.809                       | 5.32E-15                         | 2.267                            | 3.11E-08                              |
| YE_RS19545 | <i>rplQ</i> | 50S ribosomal protein L17    | 3.194                  | 2.95E-12                    | 3.114                       | 4.28E-10                         | 2.497                            | 9.71E-08                              |
| YE_RS19605 | <i>rpsH</i> | 30S ribosomal protein S8     | 2.217                  | 9.95E-08                    | 4.844                       | 6.50E-22                         | 2.307                            | 8.56E-10                              |
| YE_RS19600 | <i>rplF</i> | 50S ribosomal protein L6     | 2.403                  | 9.81E-15                    | 3.56                        | 2.50E-24                         | NS                               | NS                                    |
| YE_RS09610 | <i>rplT</i> | 50S ribosomal protein L20    | 2.037                  | 2.60E-05                    | 2.138                       | 1.08E-05                         | NS                               | NS                                    |
| YE_RS19650 | <i>rplV</i> | 50S ribosomal protein L22    | 2.123                  | 2.12E-12                    | 3.243                       | 3.59E-17                         | NS                               | NS                                    |
| YE_RS19655 | <i>rpsS</i> | 30S ribosomal protein S19    | 2.048                  | 1.98E-07                    | 2.416                       | 4.02E-09                         | NS                               | NS                                    |
| YE_RS01490 | <i>rplL</i> | 50S ribosomal protein L7/L12 | NS                     | NS                          | 2.68                        | 1.29E-11                         | NS                               | NS                                    |

|            |             |                           |       |          |       |          |       |          |
|------------|-------------|---------------------------|-------|----------|-------|----------|-------|----------|
| YE_RS02280 | <i>rpsO</i> | 30S ribosomal protein S15 | 2.4   | 2.19E-05 | 5.133 | 3.04E-12 | 2.292 | 0.000277 |
| YE_RS02045 | <i>rpsF</i> | 30S ribosomal protein S6  | 2.523 | 1.73E-10 | 3.05  | 3.35E-09 | 2.406 | 8.76E-09 |
| YE_RS16465 | <i>rpsB</i> | 30S ribosomal protein S2  | 2.505 | 1.10E-08 | 4.681 | 7.39E-17 | 2.774 | 6.66E-10 |
| YE_RS08205 | <i>rpmF</i> | 50S ribosomal protein L32 | NS    | NS       | 2.705 | 6.74E-06 | NS    | NS       |
| YE_RS19570 | <i>rpmJ</i> | 50S ribosomal protein L36 | 2.346 | 3.14E-05 | 2.86  | 2.01E-05 | 0.219 | 8.03E-05 |
| YE_RS19615 | <i>rplE</i> | 50S ribosomal protein L5  | 2.199 | 9.20E-13 | 3.503 | 7.15E-19 | NS    | NS       |
| YE_RS19610 | <i>rpsN</i> | 30S ribosomal protein S14 | 2.457 | 5.75E-11 | 5.006 | 1.75E-20 | 2.373 | 2.35E-09 |
| YE_RS19680 | <i>rpsJ</i> | 30S ribosomal protein S10 | 3.235 | 1.45E-14 | 6.795 | 2.35E-36 | 3.962 | 4.46E-17 |
| YE_RS02175 | <i>rplU</i> | 50S ribosomal protein L21 | 2.396 | 6.61E-05 | 2.945 | 3.85E-06 | 2.051 | 0.001674 |
| YE_RS19665 | <i>rplW</i> | 50S ribosomal protein L23 | 2.458 | 3.58E-10 | 4.269 | 5.34E-27 | 2.432 | 9.85E-12 |
| YE_RS19660 | <i>rplB</i> | 50S ribosomal protein L2  | 2.039 | 4.33E-07 | 3.18  | 3.34E-16 | NS    | NS       |
| YE_RS01480 | <i>rplA</i> | 50S ribosomal protein L1  | 2.384 | 2.81E-10 | 4.441 | 6.94E-25 | NS    | NS       |
| YE_RS01485 | <i>rplJ</i> | 50S ribosomal protein L10 | NS    | NS       | 3.823 | 5.51E-19 | NS    | NS       |
| YE_RS02055 | <i>rpsR</i> | 30S ribosomal protein S18 | 2.129 | 2.35E-06 | 3.445 | 3.62E-07 | 2.357 | 4.01E-07 |
| YE_RS19710 | <i>rpsL</i> | 30S ribosomal protein S12 | 2.662 | 5.04E-08 | 5.235 | 2.63E-17 | 2.879 | 8.99E-09 |
| YE_RS18765 | <i>rpsI</i> | 30S ribosomal protein S9  | 2.631 | 2.49E-06 | 2.333 | 9.39E-05 | 2.02  | 0.000994 |
| YE_RS04260 | <i>rpsP</i> | 30S ribosomal protein S16 | 2.06  | 0.000151 | 4.307 | 1.74E-13 | 2.333 | 1.24E-05 |
| YE_RS19640 | <i>rplP</i> | 50S ribosomal protein L16 | NS    | NS       | 3.297 | 2.24E-12 | NS    | NS       |
| YE_RS19595 | <i>rplR</i> | 50S ribosomal protein L18 | 2.412 | 6.16E-17 | 4.697 | 6.46E-36 | 2.517 | 2.80E-14 |
| YE_RS19580 | <i>rplO</i> | 50S ribosomal protein L15 | 2.253 | 9.31E-18 | NS    | NS       | NS    | NS       |
| YE_RS19590 | <i>rpsE</i> | 30S ribosomal protein S5  | 2.508 | 5.55E-12 | 3.492 | 1.61E-18 | NS    | NS       |
| YE_RS19560 | <i>rpsK</i> | 30S ribosomal protein S11 | 2.782 | 3.92E-11 | 2.802 | 1.01E-13 | 2.051 | 5.98E-11 |
| YE_RS19565 | <i>rpsM</i> | 30S ribosomal protein S13 | 2.844 | 6.46E-14 | 3.076 | 9.10E-13 | 2.354 | 5.31E-13 |
| YE_RS07755 | <i>rpsA</i> | 30S ribosomal protein S1  | NS    | NS       | 2.885 | 1.72E-05 | NS    | NS       |
| YE_RS01475 | <i>rplK</i> | 50S ribosomal protein L11 | 2.378 | 8.97E-13 | 7.685 | 4.76E-30 | 3.066 | 1.90E-16 |
| YE_RS19620 | <i>rplX</i> | 50S ribosomal protein L24 | 2.545 | 2.01E-09 | 3.76  | 5.02E-16 | 2.085 | 4.02E-06 |
| YE_RS19625 | <i>rplN</i> | 50S ribosomal protein L14 | 2.266 | 3.25E-12 | 6.21  | 1.32E-31 | 3.291 | 3.80E-23 |
| YE_RS00330 | <i>rpmG</i> | 50S ribosomal protein L33 | 2.253 | 2.45E-06 | 2.664 | 6.69E-07 | NS    | NS       |
| YE_RS19555 | <i>rpsD</i> | 30S ribosomal protein S4  | 3.07  | 7.26E-20 | 6.41  | 3.30E-33 | 4.723 | 3.01E-39 |
| YE_RS19670 | <i>rplD</i> | 50S ribosomal protein L4  | 2.494 | 1.07E-11 | 4.296 | 6.52E-38 | 2.49  | 2.36E-14 |
| YE_RS19675 | <i>rplC</i> | 50S ribosomal protein L3  | 2.894 | 1.65E-22 | 5.91  | 1.89E-29 | 3.735 | 2.95E-15 |
| YE_RS02180 | <i>rpmA</i> | 50S ribosomal protein L27 | 2.117 | 6.85E-05 | 2.174 | 8.77E-05 | NS    | NS       |
| YE_RS19705 | <i>rpsG</i> | 30S ribosomal protein S7  | 2.803 | 2.97E-11 | 6.297 | 9.41E-25 | 3.56  | 4.08E-17 |
| YE_RS02180 | <i>rpmA</i> | 50S ribosomal protein L27 | 2.117 | 6.85E-05 | NS    | NS       | NS    | NS       |

**Supplementary Table S4.** The growth gap of mutant strain compared with WT in medium at 30 h.

| Strains                 | LBNS   | LBNS+R | LBNS+Cys-Cys | LBNS+H | LBNS+REH | LBNS+REHCys-Cys |
|-------------------------|--------|--------|--------------|--------|----------|-----------------|
| <i>ΔdksA</i>            | 17.61% | 15.53% | 11.79%       | 13.71% | 13.34%   | 11.87%          |
| <i>ΔrelAΔspoT</i>       | 33.50% | 9.11%  | 10.21%       | 11.59% | 14.79%   | 18.19%          |
| <i>ΔdksAΔrelAΔspoT</i>  | 32.97% | 12.95% | 12.98%       | 12.15% | 24.61%   | 21.11%          |
| <i>ΔdksA(dksA)</i>      | 10.02% | 4.73%  | 2.05%        | -2.48% | -0.18%   | -1.92%          |
| <i>ΔrelAΔspoT(spoT)</i> | 16.29% | 10.08% | 0.88%        | 2.94%  | 3.34%    | 6.90%           |

R, Arginine; Cys-Cys, Cystine; H, Histidine; E, Glutamic acid

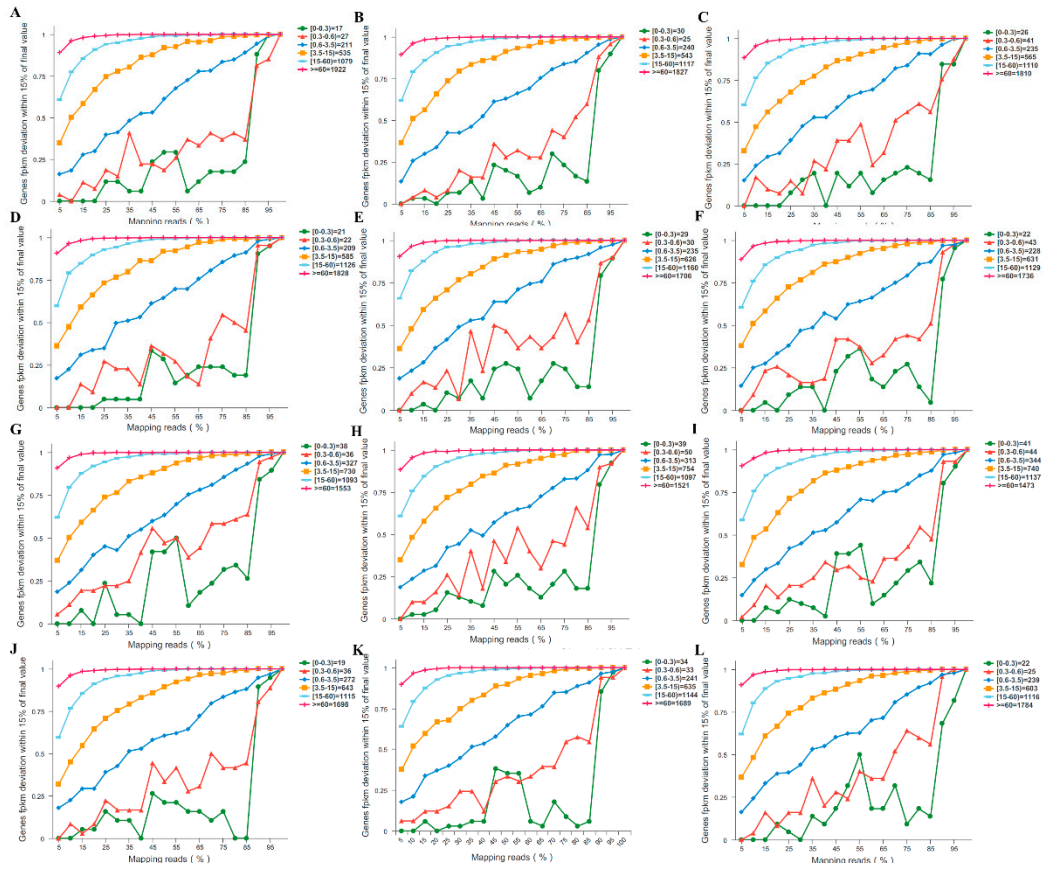

**Supplementary Figure S1.** Saturation curve of RNA sequencing. (A)-(C) saturation curve of three WT samples; (D)-(F) saturation curve of three  $\Delta dksA$  samples; (G)-(H) saturation curve of three  $\Delta relA\Delta spoT$  samples; (J)-(K) saturation curve of three  $\Delta dksA\Delta relA\Delta spoT$  samples.

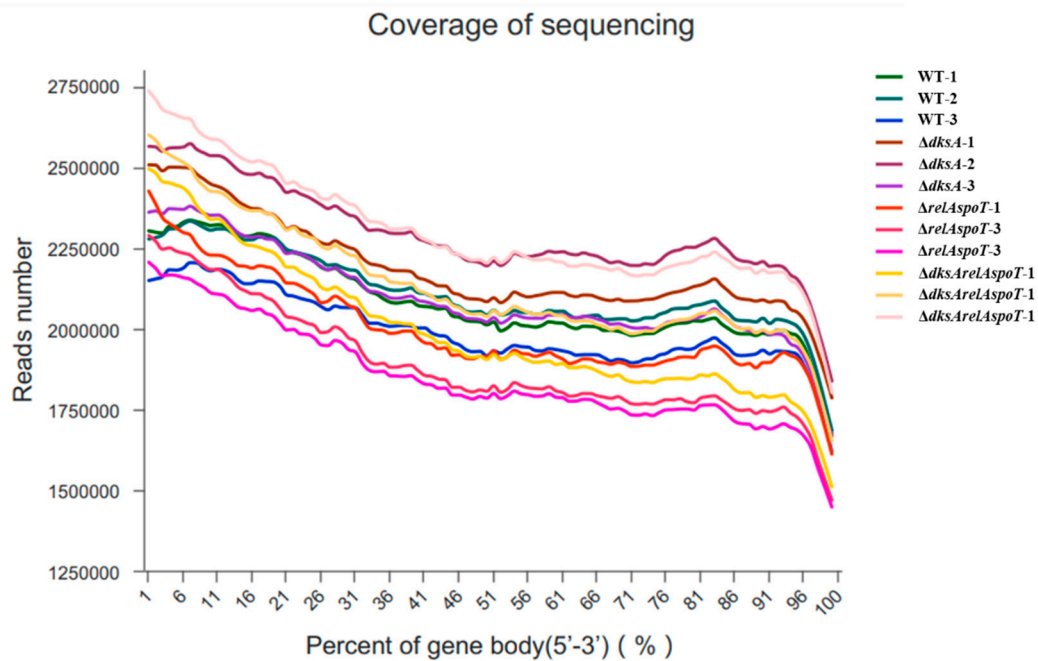

**Supplementary Figure S2.** The map of sequencing gene coverage.

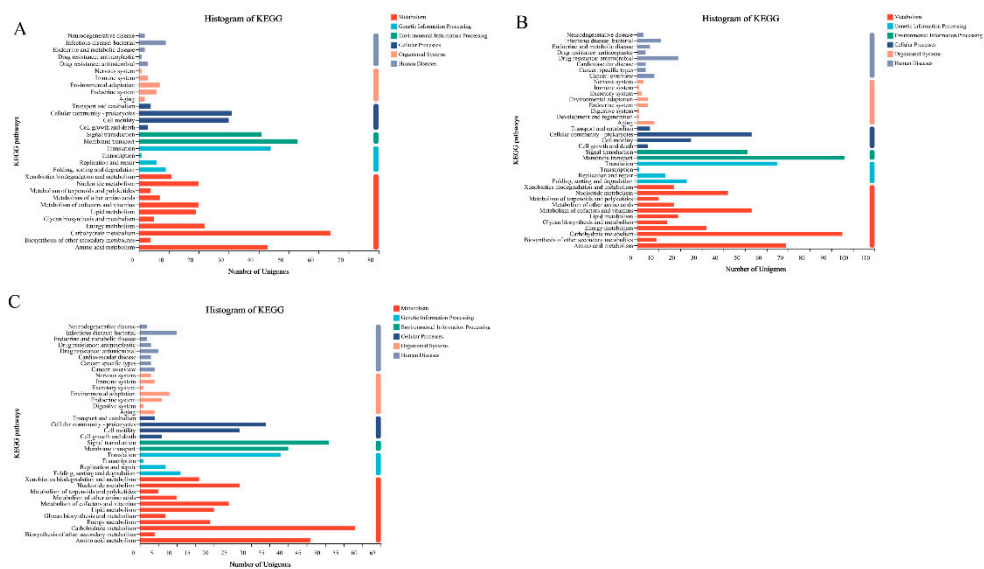

**Supplementary Figure S3.** Annotation of sequencing results based on KEGG database. (A) *ΔdksA*; (B) *ΔrelAspoT*; (C) *ΔdksAΔrelAspoT*.

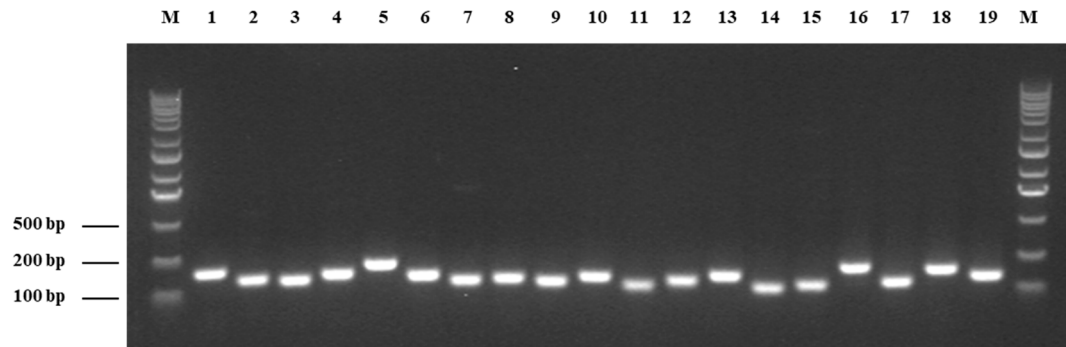

**Supplementary Figure S4.** Agarose electrophoresis of DNA amplified with the primers used for RT-qPCR. 1-19 represents *pdeR*, *yihX*, *rpsN*, *rpoA*, *trmD*, *dhaK*, *gntT*, *YE\_RS15980*, *dusB*, *corA*, *epmA*, *trmL*, *fliE*, *flgC*, *alaC*, *fyuA*, *hypE*, *lsrD*, *hisJ*, respectively.

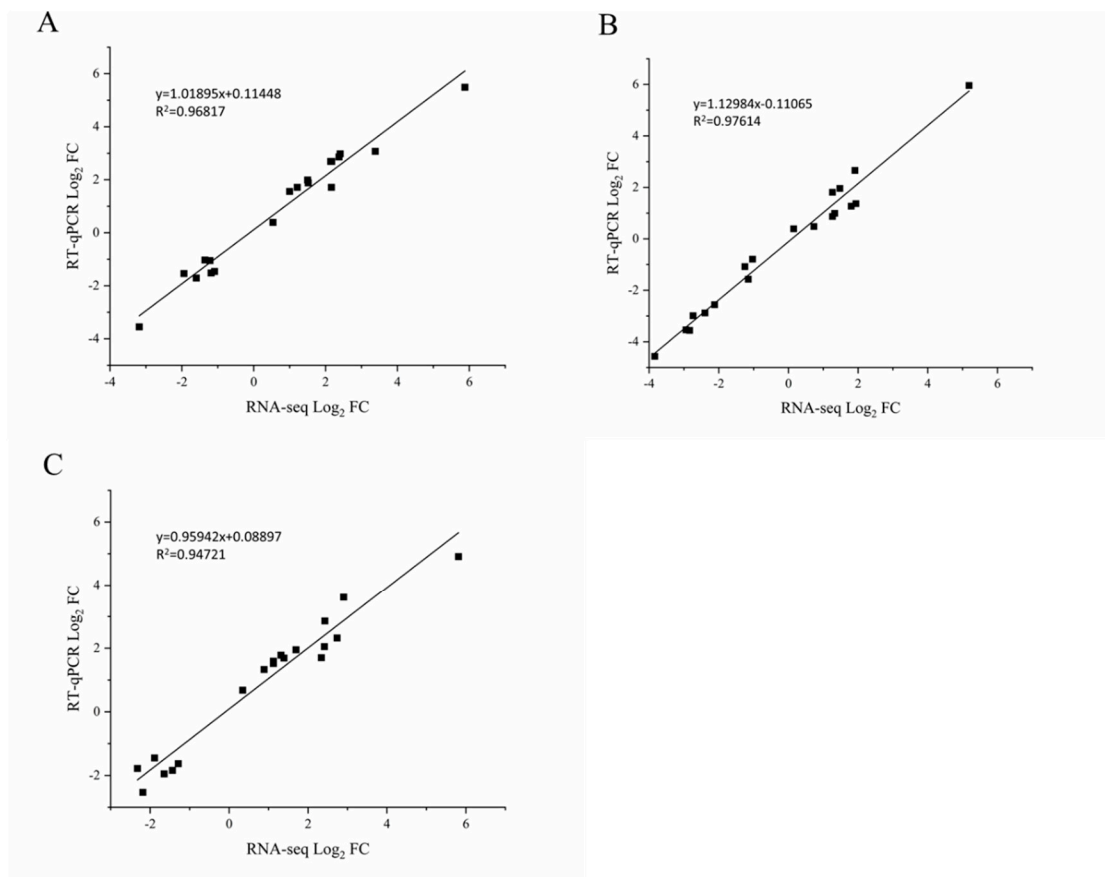

**Supplementary Figure S5.** Comparison results between RNA-Seq data (X axis) and RT-qPCR data (Y axis). (A)  $\Delta dksA$ ; (B)  $\Delta relA\Delta spoT$ ; (C)  $\Delta dksA\Delta relA\Delta spoT$ . Data are means and SEM from three independent RT-qPCRs.
